# Supplementary material for: Deconstructing Complex Interventions: Piloting a Framework of Delivery Features and Intervention Strategies for the Eating Disorders in Weight-Related Therapy (EDIT) Collaboration
Source: MDPI journal article supplement (doi:10.3390/nu15061414), 2023-03-15
Supplement: s1 [file s1]

**Supplementary Table 1: Characteristics of studies included in pilot coding**

| Study              | Year | Country                  | Population  | Intervention arms                               |
|--------------------|------|--------------------------|-------------|-------------------------------------------------|
| Lister et al [1]   | 2020 | Australia                | Adolescents | 1. Intermittent energy restriction              |
|                    |      |                          |             | 2. Continuous energy restriction                |
| Salvo et al [2]    | 2018 | Brazil                   | Adults      | 1. Treatment as usual (TAU)                     |
|                    |      |                          |             | 2. Mindfulness eating awareness (MBEAT) + TAU   |
|                    |      |                          |             | 3. Mindfulness health promotion (MBHP) + TAU    |
| Beaulieu et al [3] | 2019 | United Kingdom           | Adults      | 1. Intermittent energy restriction              |
|                    |      |                          |             | 2. Continuous energy restriction                |
| Di Marco et al [4] | 2009 | United States of America | Adults      | 1. Guided self-help behavioural weight loss     |
|                    |      |                          |             | 2. Guided self-help + motivational interviewing |
| Raynor et al [5]   | 2005 | United States of America | Adults      | 1. Reduced snack variety                        |
|                    |      |                          |             | 2. No variety limit for snacks                  |
| Epstein et al [6]  | 2001 | United States of America | Adolescents | 1. Problem-solving skills for child             |
|                    |      |                          |             | 2. Problem-solving skills for child and parent  |
|                    |      |                          |             | 3. No additional problem-solving skills         |

**Supplementary table 2: Modifications to coding framework**

| New delivery features added                               |                                                                                                                 |
|-----------------------------------------------------------|-----------------------------------------------------------------------------------------------------------------|
| Cluster                                                   | Variable                                                                                                        |
| Why – theory: Rational, theory or goal                    | Weight loss and maintenance                                                                                     |
| Target population/ recipient of the intervention: support | Family or household based treatment approach                                                                    |
| What – outcome measures:                                  | Eating behaviour outcomes                                                                                       |
| Where – intervention setting: Location                    | Virtual                                                                                                         |
| When and how much – intervention dose:                    | Intensity                                                                                                       |
| Post-intervention support                                 | Referral to other sources                                                                                       |
| Post-intervention support                                 | Additional information provided                                                                                 |
| Removed delivery features                                 |                                                                                                                 |
| Cluster                                                   | Variable                                                                                                        |
| Why – theory: Rational, theory or goal                    | Weight-neutral – intervention focus on health improvement (e.g. HAES approach)                                  |
| New intervention strategies                               |                                                                                                                 |
| Cluster                                                   | Variable                                                                                                        |
| Addresses disordered eating                               | Education on risk of eating disorders                                                                           |
| Addressing sleep health                                   | Education on sleep health (e.g. duration, quality, routine)                                                     |
| Addressing sleep health                                   | Sleep health focused goals with/without review                                                                  |
| Addressing sleep health                                   | Encourages self-monitoring of sleep (e.g. sleep diary)                                                          |
| Addressing sleep health                                   | Problem solving barriers to improving sleep health                                                              |
| Addresses weight stigma                                   | Education to support network persons on weight stigma/teasing                                                   |
| Outcome related strategies                                | Feedback on change in metabolic health outcomes (e.g., insulin sensitivity, cholesterol levels)                 |
| Dietary self-monitoring                                   | Dietary self-monitoring - weighing food                                                                         |
| Removed intervention strategies                           |                                                                                                                 |
| Cluster                                                   | Variable                                                                                                        |
| Dietary prescription                                      | Moderate energy restriction (moderate calorie restriction)                                                      |
| Delivery of dietary intervention                          | Individual approach to dietary change                                                                           |
| Delivery of dietary intervention                          | Family-oriented approach to dietary change                                                                      |
| Addressing sleep health                                   | Promotes regular sleep routine                                                                                  |
| Addressing sleep health                                   | Promotes positive sleep environment (e.g. limit screen time before bed)                                         |
| Framing of the intervention (communication strategies)    | Language used during the intervention (e.g., weight loss, weight management, weight control, healthy lifestyle) |

## References

1. Lister, N.B., et al., *Fast track to health-Intermittent energy restriction in adolescents with obesity. A randomised controlled trial study protocol*. Obesity research & clinical practice, 2019.
2. Salvo, V., et al., *Mindfulness as a complementary intervention in the treatment of overweight and obesity in primary health care: study protocol for a randomised controlled trial*. Trials, 2018. **19**(1): p. 277.
3. Beaulieu, K., et al., *Matched Weight Loss Through Intermittent or Continuous Energy Restriction Does Not Lead To Compensatory Increases in Appetite and Eating Behavior in a Randomized Controlled Trial in Women with Overweight and Obesity*. The Journal of Nutrition, 2019. **150**(3): p. 623-633.
4. DiMarco, I.D., et al., *The use of motivational interviewing techniques to enhance the efficacy of guided self-help behavioral weight loss treatment*. Eating Behaviors, 2009. **10**(2): p. 134-136.
5. Raynor, H.A., H.M. Niemeier, and R.R. Wing, *Effect of limiting snack food variety on long-term sensory-specific satiety and monotony during obesity treatment*. Eating Behaviors, 2006. **7**(1): p. 1-14.
6. Epstein, L.H., et al., *Changes in eating disorder symptoms with pediatric obesity treatment*. The Journal of pediatrics, 2001. **139**(1): p. 58-65.
